# Supplementary material
Source: Springer Nature journal article supplement (https://www.springermedizin.de/resource/supplementary/12891_2010_1167_MOESM4_ESM.pdf/9507242)

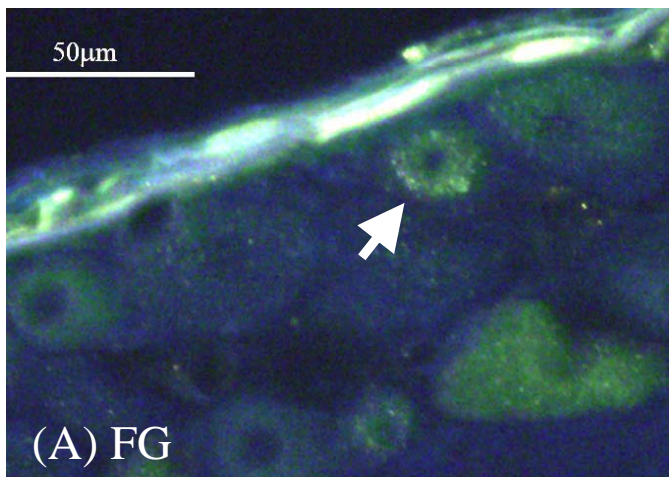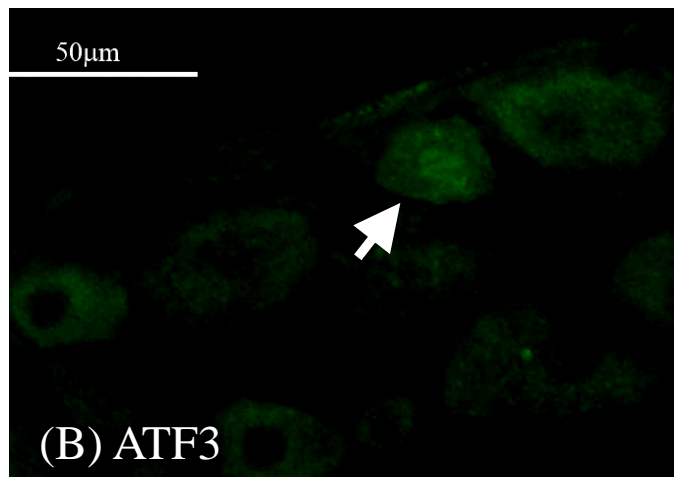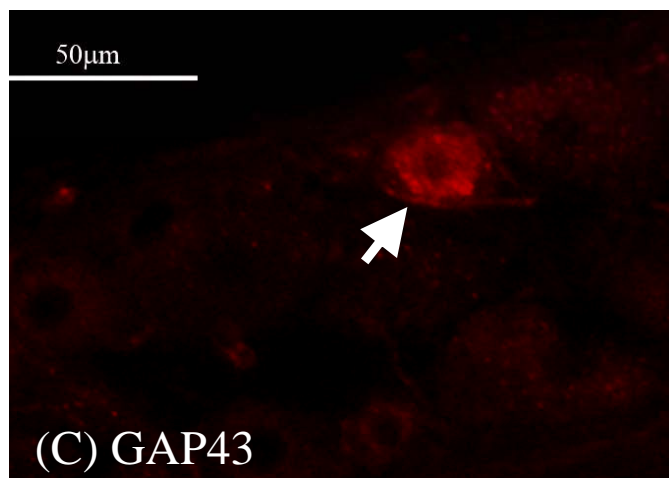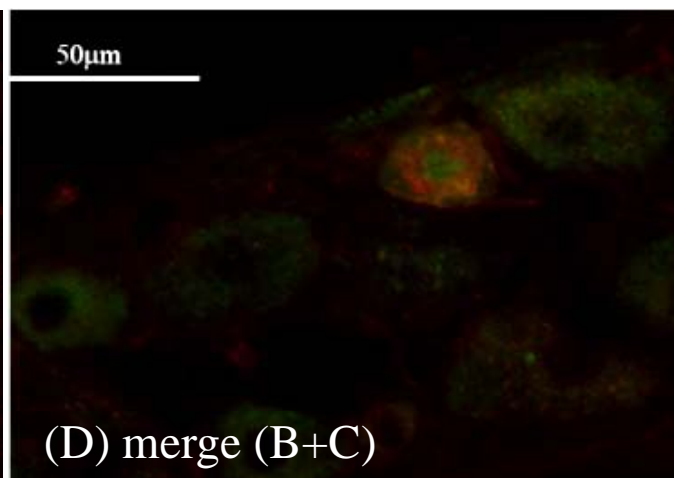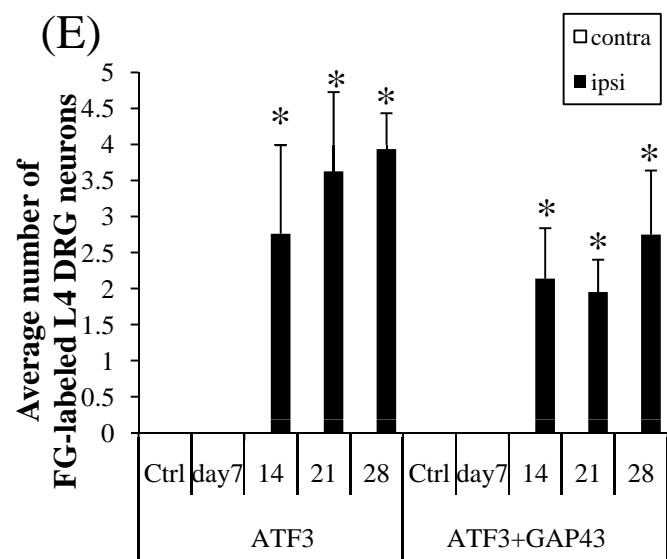

\*:  $P < 0.05$  vs Ctrl

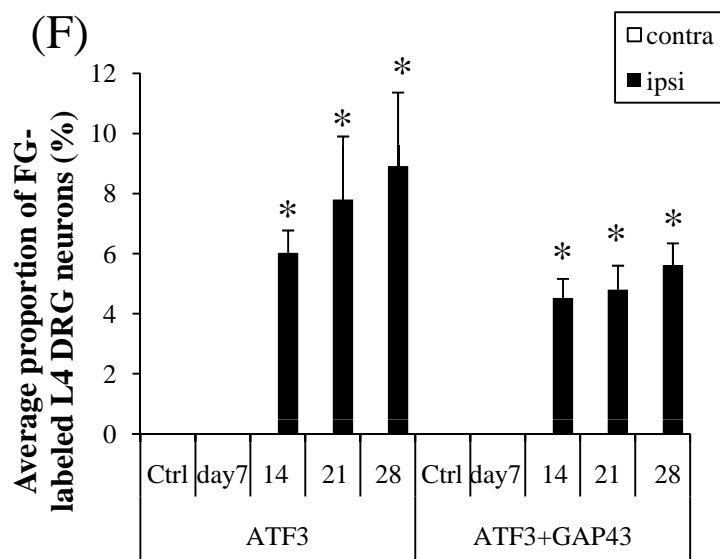

\*:  $P < 0.05$  vs Ctrl

Supplement: MOESM4 [file 9507242]
